# Supplementary material for: Transcriptomics and Proteomics Analyses Reveal JAK Signaling and Inflammatory Phenotypes during Cellular Senescence in Blind Mole Rats: The Reflections of Superior Biology
Source: MDPI journal article supplement (doi:10.3390/biology11091253), 2022-08-23
Supplement: s1 [file s1]

**Supplementary Table S1:** Primers designed for RT-qPCR analysis.

| Species        | Gene     | Left Primer          | Right Primer         |
|----------------|----------|----------------------|----------------------|
| Blind mole-rat | JAK1     | AATCTTCTTCTGGCCCGTGA | AGCAGCCACACTCAGATTCT |
|                | JAK2     | GGCAATGACAAGCAAGGACA | TGAAGGAGGGACGCTGATTT |
|                | STAT3    | CTTAAGCAGCCAAACCCCAG | CCCATCACAGGCTCAGAGAA |
|                | IL6      | GCTTGAACAATGACGAGGCC | GACATTGGCCTGCACGTTTT |
|                | p15ink4b | GTGAAGTTCCAGGTGCCCTT | GTGTGTGTGTGGGGAAATGC |
|                | B-actin  | CCACCATGTACCCAGGCATT | CGGACTCATCGTACTCCTGC |
| Mouse          | JAK1     | TCTGTCACAACCTCTTCGCC | CATCAAGGAGTGGGGTTGCT |
|                | JAK2     | AGACGAGTCAACCAGGCATG | TAACACCGCCATCCCAAGAC |
|                | STAT3    | GGGCCTGGTGTGAACTACTC | TGAAGCGCAGTAGGAAGGTG |
|                | B-Actin  | CCACCATGTACCCAGGCATT | CGGACTCATCGTACTCCTGC |
